# Supplementary material for: Pharmacological Analysis of GABAA Receptor and Sigma1R Chaperone Interaction: Research Report I―Investigation of the Anxiolytic, Anticonvulsant and Hypnotic Effects of Allosteric GABAA Receptors’ Ligands
Source: MDPI journal article supplement (doi:10.3390/ijms24119580), 2023-05-31
Supplement: s1 [file s1]

**Supplementary Table S1.** The influence of Sigma1R antagonists BD-1047 and NE-100 on mice behavior in the elevated plus-maze test.

| Experimental groups               | Number of entries into open arms (N open) | Number of entries into open arms, % (%N open) | Time spent in open arms, s (T open) | Time spent in open arms, % (%T open) | Number of entries into closed arms (N closed) | Number of total entries (N total) |
|-----------------------------------|-------------------------------------------|-----------------------------------------------|-------------------------------------|--------------------------------------|-----------------------------------------------|-----------------------------------|
| Intact<br><i>n</i> =15            | 0.0 (0.0-0.0)                             | 0.0 (0.0-0.0)                                 | 0.0 (0.0-0.0)                       | 0.0 (0.0-0.0)                        | 5.27 ± 2.34                                   | 10.80 ± 4.69                      |
| Veh1+ Veh2<br><i>n</i> =15        | 0.0 (0.0-1.0)                             | 0.0 (0.0-14.0)                                | 0.0 (0.0-3.0)                       | 0.0 (0.0-1.2)<br>* <i>p</i> =0.048   | 5.07 ± 2.25                                   | 10.80 ± 5.52                      |
| BD-1047 1.0+ Veh2<br><i>n</i> =15 | 0.0 (0.0-1.0)                             | 0.0 (0.0-10.0)                                | 0.0 (0.0-2.0)                       | 0.0 (0.0-0.8)                        | 6.67 ± 2.74                                   | 14.93 ± 5.97                      |
| NE-100 1.0+ Veh2<br><i>n</i> =15  | 0.0 (0.0-1.0)                             | 0.0 (0.0-10.0)                                | 0.0 (0.0-6.0)                       | 0.0 (0.0-2.6)                        | 5.13 ± 2.13                                   | 11.47 ± 4.84                      |
| NE-100 3.0+ Veh2<br><i>n</i> =15  | 0.0 (0.0-1.0)                             | 0.0 (0.0-17.0)                                | 0.0 (0.0-4.0)                       | 0.0 (0.0-1.8)                        | 6.67 ± 2.50                                   | 14.80 ± 4.90                      |

Data are presented as median (q25 - q75) for experimental groups N open, %N open, T open, %T open and mean ± S.D for experimental groups N closed, N total. n – the number of animals in the experimental group. Experimental groups: intact BALB/c mice (Intact), vehicle 1 + vehicle 2 (Veh1+ Veh2), BD-1047 1.0 mg/kg + vehicle 2 (BD-1047 1.0+ Veh2), NE-100 1.0 mg/kg + vehicle 2 (NE-100 1.0+ Veh2), NE-100 3.0 mg/kg + vehicle 2 (NE-100 3.0+ Veh2). Kruskal–Wallis test, Dunn’s multiple comparison test: \* - statistical significance vs. Intact.

**Supplementary Table S2.** The influence of Sigma1R antagonists BD-1047 and NE-100 on the anxiolytic effect of diazepam in the elevated plus-maze test.

| Experimental groups               | Number of entries into open arms (N open) | Number of entries into open arms, % (%N open) | Time spent in open arms, s (T open)    | Time spent in open arms, % (%T open)  | Number of entries into closed arms (N closed) | Number of total entries (N total) |
|-----------------------------------|-------------------------------------------|-----------------------------------------------|----------------------------------------|---------------------------------------|-----------------------------------------------|-----------------------------------|
| Veh1+ Veh2<br><i>n</i> =15        | 0.0 (0.0-1.0)                             | 0.0 (0.0-13.0)                                | 0.0 (0.0-3.0)                          | 0.0 (0.0-0.8)                         | 5.73 ± 2.63                                   | 12.60 ± 5.71                      |
| Veh1+D 1.0<br><i>n</i> =15        | 6.0 (5.0-9.0)<br>* <i>p</i> <0.001        | 46.0 (33.0-72.0)<br>* <i>p</i> <0.001         | 93.0 (77.0-201.0)<br>* <i>p</i> <0.001 | 39.0 (32.0-85.0)<br>* <i>p</i> <0.001 | 6.73 ± 4.22                                   | 28.0 ± 9.61<br>* <i>p</i> <0.001  |
| BD-1047 1.0+D 1.0<br><i>n</i> =15 | 4.0 (2.0-5.0)                             | 25.0 (19.0-36.0)<br># <i>p</i> =0.025         | 26.0 (19.0-37.0)<br># <i>p</i> =0.0016 | 10.0 (7.2-15.0)<br># <i>p</i> =0.002  | 10.60 ± 3.68<br># <i>p</i> =0.0054            | 29.40 ± 9.87                      |
| NE-100 1.0+D 1.0<br><i>n</i> =14  | 6.0 (3.75-8.0)                            | 50.0 (32.25-53.75)                            | 79.5 (30.25-190.3)                     | 34.95 (11.18-69.78)                   | 7.36 ± 2.24                                   | 26.43 ± 6.27                      |
| NE-100 3.0+D 1.0<br><i>n</i> =15  | 4.0 (3.0-6.0)                             | 33.0 (20.0-39.0)                              | 33.0 (14.0-59.0)<br># <i>p</i> =0.011  | 13.0 (5.2-24.0)<br># <i>p</i> =0.011  | 8.13 ± 2.59                                   | 25.27 ± 10.07                     |

Data are presented as median (q25 - q75) for experimental groups N open, %N open, T open, %T open and mean ± S.D for experimental groups N closed, N total. n – the number of animals in the experimental group. Experimental groups: vehicle 1 + vehicle 2 (Veh1+Veh2), vehicle 1 + diazepam 1.0 mg/kg (Veh1+D 1.0), BD-1047 1.0 mg/kg + diazepam 1.0 mg/kg (BD-1047 1.0+D 1.0), NE-100 1.0 mg/kg + diazepam 1.0 mg/kg (NE-100 1.0+D 1.0), NE-100 3.0 mg/kg + diazepam 1.0 mg/kg (NE-100 3.0+D 1.0). Kruskal–Wallis test, Dunn’s multiple comparison test for experimental groups N open, %N open, T open, %T open, one-way ANOVA and the post hoc Sidak multiple comparisons test for experimental groups N closed, N total: \* - statistical significance vs. Veh1+Veh2, # - statistical significance vs. Veh1+D 1.0.

**Supplementary Table S3.** The influence of Sigma1R antagonists BD-1047 and NE-100 on the anxiolytic effect of phenazepam in the elevated plus-maze test.

| Experimental groups                | Number of entries into open arms (N open) | Number of entries into open arms, % (%N open) | Time spent in open arms, s (T open)     | Time spent in open arms, % (%T open)   | Number of entries into closed arms (N closed) | Number of total entries (N total) |
|------------------------------------|-------------------------------------------|-----------------------------------------------|-----------------------------------------|----------------------------------------|-----------------------------------------------|-----------------------------------|
| Veh1+Veh2<br><i>n</i> =15          | 1.0 (0.0-1.0)                             | 8.03 (0.0-17.0)                               | 0.0 (0.0-3.0)                           | 0.0 (0.0-1.1)                          | 5.73 ± 2.60                                   | 12.93 ± 5.18                      |
| Veh1+Ph 0.1<br><i>n</i> =15        | 5.0 (3.0-7.0)<br>* <i>p</i> <0.001        | 47.0 (39.0-57.0)<br>* <i>p</i> <0.001         | 119.0 (77.0-189.0)<br>* <i>p</i> <0.001 | 56.3 (33.6-76.7)<br>* <i>p</i> <0.001  | 5.73 ± 3.31                                   | 21.80 ± 9.03<br>* <i>p</i> =0.001 |
| BD-1047 1.0+Ph 0.1<br><i>n</i> =14 | 2.0 (1.0-3.0)<br># <i>p</i> =0.011        | 22.0 (20.0-36.5)<br># <i>p</i> =0.016         | 25.0 (12.75-40.25)<br># <i>p</i> =0.019 | 10.1 (4.47-14.93)<br># <i>p</i> =0.016 | 5.71 ± 2.27                                   | 15.43 ± 5.39<br># <i>p</i> =0.031 |
| NE-100 3.0+ Ph 0.1<br><i>n</i> =14 | 1.0 (0.75-2.0)<br># <i>p</i> <0.001       | 19.0 (9.75-26.0)<br># <i>p</i> <0.001         | 13.5 (0.75-21.75)<br># <i>p</i> <0.001  | 5.0 (0.3-8.2)<br># <i>p</i> <0.001     | 5.57 ± 1.99                                   | 13.93 ± 5.28<br># <i>p</i> =0.006 |

Data are presented as median (q25 - q75) for experimental groups N open, %N open, T open, %T open and mean ± S.D for experimental groups N closed, N total. *n* – the number of animals in the experimental group. Experimental groups: vehicle 1 + vehicle 2 (Veh1+ Veh2), vehicle 1 + phenazepam 0.1 mg/kg (Veh1+Ph 0.1), BD-1047 1.0 mg/kg + phenazepam 0.1 mg/kg (BD-1047 1.0+Ph 0.1), NE-100 3.0 mg/kg + phenazepam 0.1 mg/kg (NE-100 3.0+Ph 0.1). Kruskal–Wallis test, Dunn’s multiple comparison test for experimental groups N open, %N open, T open, %T open, one-way ANOVA and the post hoc Sidak multiple comparisons test for experimental groups N closed, N total: \* - statistical significance vs. Veh1+Veh2, # - statistical significance vs. Veh1+Ph 0.1.

**Supplementary Table S4.** The influence of Sigma1R agonist PRE-084 on the anxiolytic effect of diazepam in the elevated plus-maze test.

| Experimental groups              | Number of entries into open arms (N open) | Number of entries into open arms, % (%N open) | Time spent in open arms, s (T open)      | Time spent in open arms, % (%T open)     | Number of entries into closed arms (N closed) | Number of total entries (N total)  |
|----------------------------------|-------------------------------------------|-----------------------------------------------|------------------------------------------|------------------------------------------|-----------------------------------------------|------------------------------------|
| Veh1+Veh2<br><i>n</i> =8         | 0.0 (0.0-0.0)                             | 0.0 (0.0-0.0)                                 | 0.0 (0.0-0.0)                            | 0.0 (0.0-0.0)                            | 4.63 ± 2.93                                   | 9.63 ± 5.98                        |
| Veh1+D 1.0<br><i>n</i> =8        | 7.0 (6.25-9.75)<br>* <i>p</i> =0.001      | 56.5 (47.0-59.75)<br>* <i>p</i> <0.001        | 124.0 (118.5-144.5)<br>* <i>p</i> =0.004 | 49.05 (42.23-55.25)<br>* <i>p</i> =0.026 | 6.5 ± 1.77                                    | 28.88 ± 5.54<br>* <i>p</i> <0.001  |
| PRE-084 1.0+D 1.0<br><i>n</i> =8 | 7.0 (5.25-10.5)<br>* <i>p</i> =0.002      | 47.5 (36.5-52.75)<br>* <i>p</i> =0.007        | 131.0 (120.3-186.0)<br>* <i>p</i> <0.001 | 62.5 (55.53-67.85)<br>* <i>p</i> <0.001  | 8.38 ± 3.46<br>* <i>p</i> =0.042              | 32.25 ± 11.78<br>* <i>p</i> <0.001 |

Data are presented as median (q25-q75) for experimental groups N open, %N open, T open, %T open and mean ± S.D for experimental groups N closed, N total. *n* – the number of animals in the experimental group. Experimental groups: vehicle 1 + vehicle 2 (Veh1+ Veh2), vehicle 1 + diazepam 1.0 mg/kg (Veh1+D 1.0), PRE-084 1.0 mg/kg + diazepam 1.0 mg/kg (PRE-084 1.0+D 1.0). Kruskal–Wallis test, Dunn’s multiple comparison test for experimental groups N open, %N open, T open, %T open, one-way ANOVA and the post hoc Sidak multiple comparisons test for experimental groups N closed, N total: \* - statistical significance vs. Veh1+Veh2.

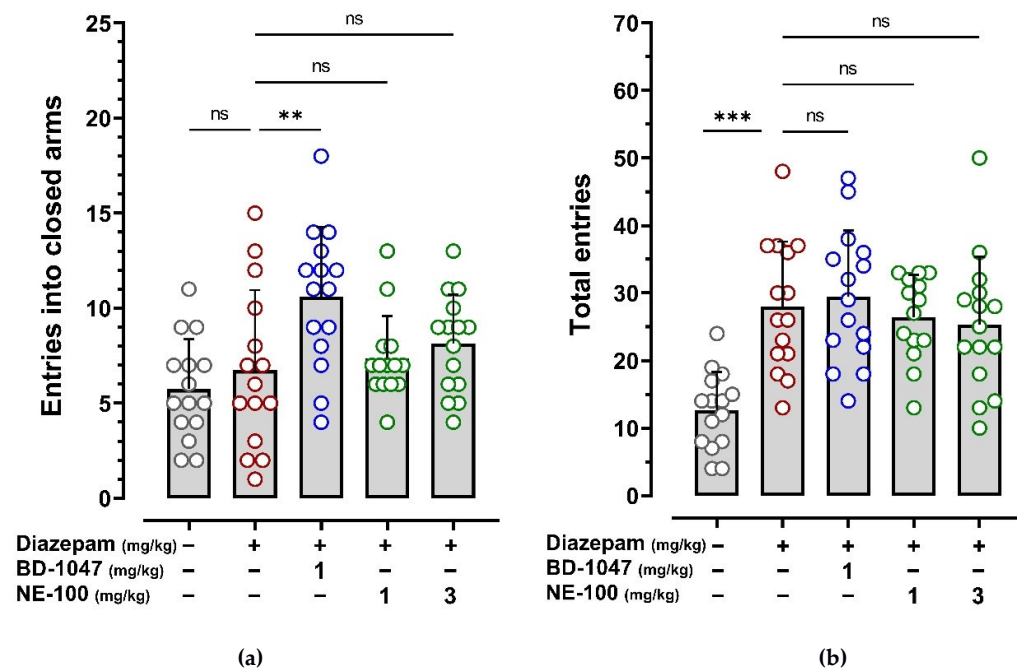

**Supplementary Figure S1.** Influence of Sigma1R antagonists BD-1047 and NE-100 on the effect of diazepam evaluated by the parameters “entries into closed arm” and “total entries” in the elevated plus-maze test. **(a)** The number of entries into the closed arms (N closed); **(b)** The number of total entries into the open and closed arms (N total). Vehicle 2 and diazepam (1.0 mg/kg) were injected i.p. 30 min prior to the EPM exposition. Vehicle 1, selective Sigma1R antagonists BD-1047 (1.0 mg/kg) and NE-100 (1.0 and 3.0 mg/kg) were injected i.p. 30 min prior diazepam. Data are presented as mean with SD. Statistically significant differences according to the one-way ANOVA and the post hoc Sidak multiple comparisons test: ns - not significant; \*\*  $p < 0.01$ ; \*\*\*  $p < 0.001$ .

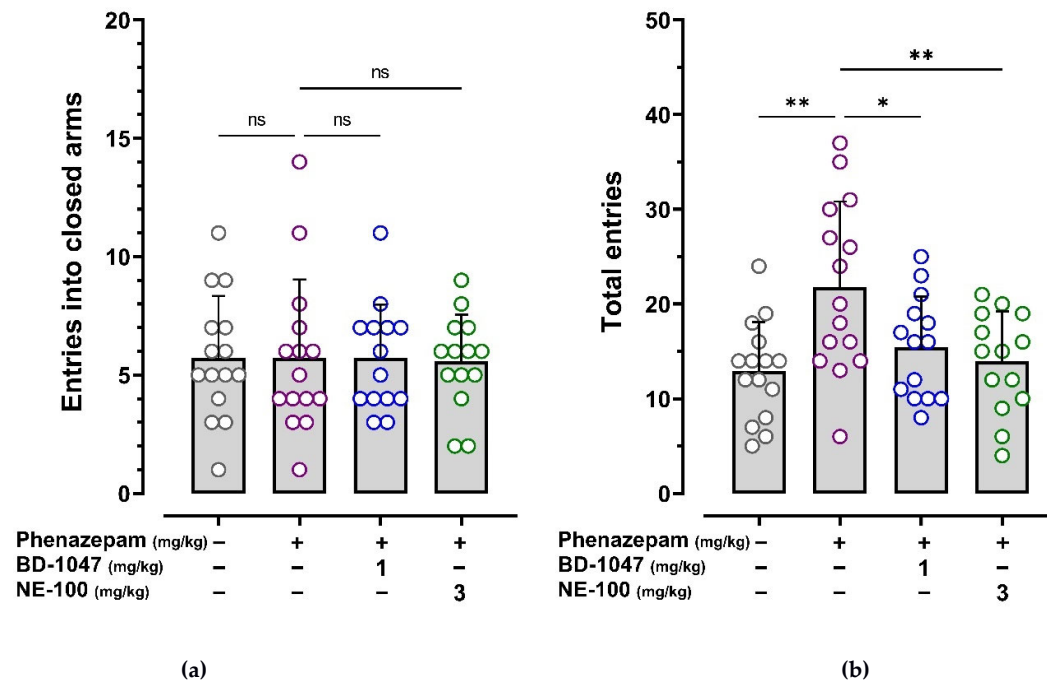

**Supplementary Figure S2.** Influence of Sigma1R antagonists BD-1047 and NE-100 on the effect of phenazepam evaluated by the parameters “entries into closed arm” and “total entries” in the elevated plus-maze test. **(a)** The number of entries into the closed arms (N closed); **(b)** The number of total entries into the open and closed arms (N total). Vehicle 2 and phenazepam (0.1 mg/kg) were injected i.p. 30 min prior to the EPM exposition. Vehicle 1, selective Sigma1R antagonists BD-1047 (1.0 mg/kg) and NE-100 (3.0 mg/kg) were injected i.p. 30 min prior phenazepam. Data are presented as mean with SD. Statistically significant differences according to the one-way ANOVA and the post hoc Sidak multiple comparisons test: ns - not significant; \*  $p < 0.05$ ; \*\*  $p < 0.01$ .

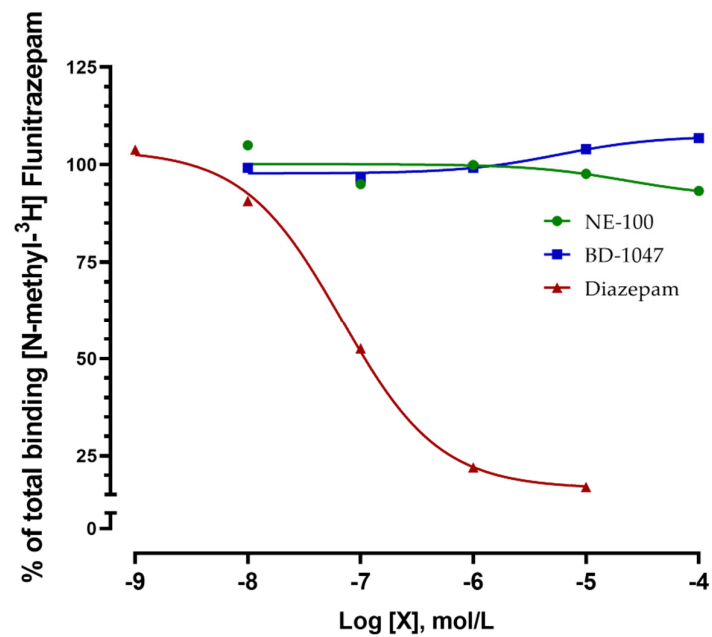

**Supplementary Figure S3.** Competitive interaction of diazepam and Sigma1R antagonists BD-1047 and NE-100 with [N-methyl-<sup>3</sup>H] Flunitrazepam. Data were obtained in the brain homogenates of BALB/c mice ( $n=2$ ). IC<sub>50</sub> diazepam = 68 nM.

**Supplementary Table S5.** The influence of Sigma1R antagonist BD-1047 on anticonvulsant activity of diazepam in the intravenous pentylenetetrazol infusion test on mice.

| Experimental groups                                          | Dose of PTZ to induce clonic jerks,<br>mg/kg<br>Mean $\pm$ SEM (min;max) | Dose of PTZ to induce generalized clonic<br>seizure, mg/kg<br>Mean $\pm$ SEM (min;max) | Dose of PTZ to induce generalized<br>tonic seizure, mg/kg<br>Mean $\pm$ SEM (min;max) |
|--------------------------------------------------------------|--------------------------------------------------------------------------|----------------------------------------------------------------------------------------|---------------------------------------------------------------------------------------|
| <b>1% PTZ</b><br><i>n</i> =10                                | 34.86 $\pm$ 1.65<br>(24;41)                                              | 43.52 $\pm$ 2.47<br>(34;60)                                                            | 100.39 $\pm$ 5.12<br>(73;123)                                                         |
| <b>BD-1047 1 mg/kg, 1% PTZ</b><br><i>n</i> =11               | 39.49 $\pm$ 1.30<br>(30;45)                                              | 46.76 $\pm$ 2.11<br>(34;56)                                                            | 103.47 $\pm$ 5.82<br>(70;136)                                                         |
| <b>BD-1047 10 mg/kg, 1% PTZ</b><br><i>n</i> =9               | 35.50 $\pm$ 2.26<br>(29;52)                                              | 47.06 $\pm$ 4.01<br>(35;77)                                                            | 102.46 $\pm$ 9.59<br>(53;139)                                                         |
| <b>BD-1047 20 mg/kg, 1% PTZ</b><br><i>n</i> =9               | 33.14 $\pm$ 2.60<br>(24;47)                                              | 42.86 $\pm$ 2.56<br>(32;53)                                                            | 86.28 $\pm$ 10.02<br>(48;128)                                                         |
| <b>Diaz 1 mg/kg, 1% PTZ</b><br><i>n</i> =8                   | 102.46 $\pm$ 9.59<br>(55;83) #### <i>p</i> <0.0001                       | 81.32 $\pm$ 3.31<br>(68;95) #### <i>p</i> <0.0001                                      | 181.09 $\pm$ 7.10<br>(146;299) #### <i>p</i> <0.0001                                  |
| <b>BD-1047 1 mg/kg, Diaz 1 mg/kg, 1% PTZ</b><br><i>n</i> =5  | 70.65 $\pm$ 3.55<br>(60;81)                                              | 91.14 $\pm$ 5.15<br>(73;103)                                                           | 157.66 $\pm$ 18.51<br>(110;208)                                                       |
| <b>BD-1047 10 mg/kg, Diaz 1 mg/kg, 1% PTZ</b><br><i>n</i> =8 | 68.31 $\pm$ 3.13<br>(56;81)                                              | 80.26 $\pm$ 2.69<br>(68;90)                                                            | 149.79 $\pm$ 7.64<br>(115;174)                                                        |
| <b>BD-1047 20 mg/kg, Diaz 1 mg/kg, 1% PTZ</b><br><i>n</i> =7 | 50.37 $\pm$ 1.58<br>(42;55) **** <i>p</i> <0.0001                        | 64.39 $\pm$ 3.76<br>(55;81) ** <i>p</i> =0.0057                                        | 133.54 $\pm$ 10.58<br>(99;166) ** <i>p</i> =0.0068                                    |

*n* – the number of animals in the experimental group. Diaz – Diazepam. Statistically significant differences according to the one-way ANOVA and the post hoc Dunnet multiple comparisons test: \* - vs. Diaz 1 mg/kg, 1% PTZ; # - vs. 1% PTZ.



**Supplementary Table S6.** The influence of Sigma1R agonist PRE-084 on anticonvulsant activity of diazepam in the intravenous pentylenetetrazol infusion test on mice.

| Experimental groups                                               | Dose of PTZ to induce clonic jerks,<br>mg/kg<br>Mean $\pm$ SEM (min;max) | Dose of PTZ to induce generalized clonic<br>seizure, mg/kg<br>Mean $\pm$ SEM (min;max) | Dose of PTZ to induce generalized<br>tonic seizure, mg/kg<br>Mean $\pm$ SEM (min;max) |
|-------------------------------------------------------------------|--------------------------------------------------------------------------|----------------------------------------------------------------------------------------|---------------------------------------------------------------------------------------|
| <b>1% PTZ</b><br><i>n</i> =12                                     | 43.86 $\pm$ 1.47<br>(37; 53)                                             | 51.9 $\pm$ 1.53<br>(43; 63)                                                            | 67.67 $\pm$ 3.42<br>(50; 83)                                                          |
| <b>PRE-084 5 mg/kg, 1% PTZ</b><br><i>n</i> =12                    | 49.36 $\pm$ 2.23<br>(40; 61)                                             | 57.81 $\pm$ 3.11<br>(44; 73)                                                           | 74.7 $\pm$ 6.15<br>(50; 103)                                                          |
| <b>PRE-084 20 mg/kg, 1% PTZ</b><br><i>n</i> =11                   | 43.2 $\pm$ 1.33<br>(38; 50)                                              | 50.35 $\pm$ 2.23<br>(38; 66)                                                           | 95.53 $\pm$ 5.66<br>(73; 127)                                                         |
| <b>Diaz 1 mg/kg, 1% PTZ</b><br><i>n</i> =10                       | 69.25 $\pm$ 2.31<br>(55; 78) ### <i>p</i> <0.0001                        | 84.46 $\pm$ 2.22<br>(77; 94) #### <i>p</i> <0.0001                                     | 101 $\pm$ 5.21<br>(82; 127) ## <i>p</i> =0.0055                                       |
| <b>PRE-084 5 mg/kg, Diazepam 1 mg/kg, 1% PTZ</b><br><i>n</i> =11  | 85.2 $\pm$ 2.93<br>(67; 102) **** <i>p</i> <0.0001                       | 101.5 $\pm$ 4.36<br>(82; 133) ** <i>p</i> =0.0038                                      | 130.6 $\pm$ 7.89<br>(108; 174) * <i>p</i> =0.0272                                     |
| <b>PRE-084 20 mg/kg, Diazepam 1 mg/kg, 1% PTZ</b><br><i>n</i> =12 | 81.4 $\pm$ 2.78<br>(68; 97) ** <i>p</i> =0.002                           | 91.42 $\pm$ 3.91<br>(72; 115)                                                          | 155.8 $\pm$ 11.46<br>(88; 218) **** <i>p</i> <0.0001                                  |

*n* – the number of animals in the experimental group. Diaz – Diazepam. Statistically significant differences according to the one-way ANOVA and the post hoc Dunnet multiple comparisons test: \* - vs. Diaz 1 mg/kg, 1% PTZ; # - vs. 1% PTZ.

**Supplementary Table S7.** The influence of Sigma1R antagonist BD-1047 and agonist PRE-084 on mice falling asleep time and sleeping time in the pentobarbital-induced sleep test on mice.

| Experimental groups                                                             | Falling asleep time, s<br>Mean ± SEM (min;max)   | Sleeping time, s<br>Mean ± SEM (min;max)                   |
|---------------------------------------------------------------------------------|--------------------------------------------------|------------------------------------------------------------|
| <b>Pentobarbital sodium 50 mg/kg</b><br><i>n</i> =10                            | 229 ± 5.63<br>(206; 262)                         | 5842.7 ± 277.05<br>(4763; 6870)                            |
| <b>BD-1047 1 mg/kg</b><br><b>Pentobarbital sodium 50 mg/kg</b><br><i>n</i> =10  | 260 ± 7.33<br>(233; 308)<br>** <i>p</i> =0.0023  | 4900.5 ± 84.14<br>(4370; 5213)<br>** <i>p</i> =0.0037      |
| <b>BD-1047 10 mg/kg</b><br><b>Pentobarbital sodium 50 mg/kg</b><br><i>n</i> =10 | 240.2 ± 4.91<br>(216; 263)                       | 4944.9 ± 171.45<br>(3935; 5625)<br>** <i>p</i> =0.0056     |
| <b>PRE-084 1 mg/kg</b><br><b>Pentobarbital sodium 50 mg/kg</b><br><i>n</i> =10  | 222.8 ± 17.59<br>(150; 290)                      | 11078.56 ± 1632.8<br>(4680; 19160)<br>*** <i>p</i> =0.0008 |
| <b>PRE-084 5 mg/kg</b><br><b>Pentobarbital sodium 50 mg/kg</b><br><i>n</i> =10  | 190.1 ± 8.98<br>(150; 230)<br>* <i>p</i> =0.0473 | 12246 ± 665.69<br>(8980; 15579)<br>**** <i>p</i> <0.0001   |
| <b>Diazepam 1 mg/kg</b><br><b>Pentobarbital sodium 50 mg/kg</b><br><i>n</i> =10 | 244 ± 8.46<br>(210; 285)                         | 11336.5 ± 641.45<br>(8730; 14580)<br>*** <i>p</i> =0.0003  |

*n* – the number of animals in the experimental group. Statistically significant differences according to the one-way ANOVA and the post hoc Dunnet multiple comparisons test: \* - statistical significance vs. Pentobarbital sodium 50 mg/kg. \* *p* < 0.05; \*\* *p* < 0.01; \*\*\* *p* < 0.001; \*\*\*\* *p* < 0,0001.

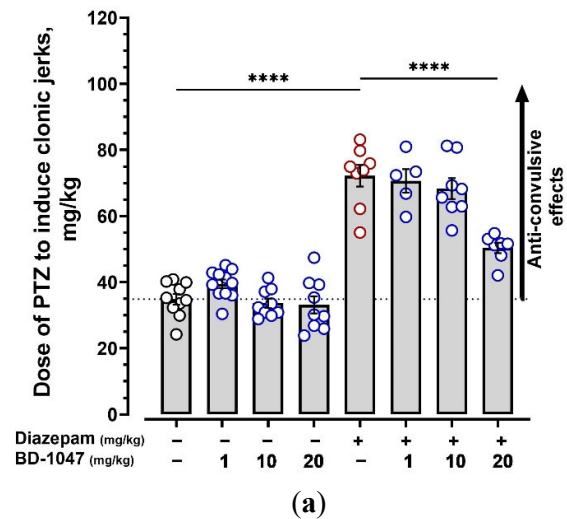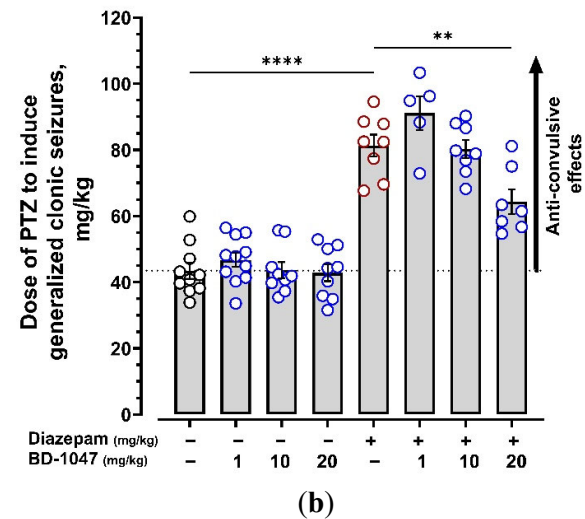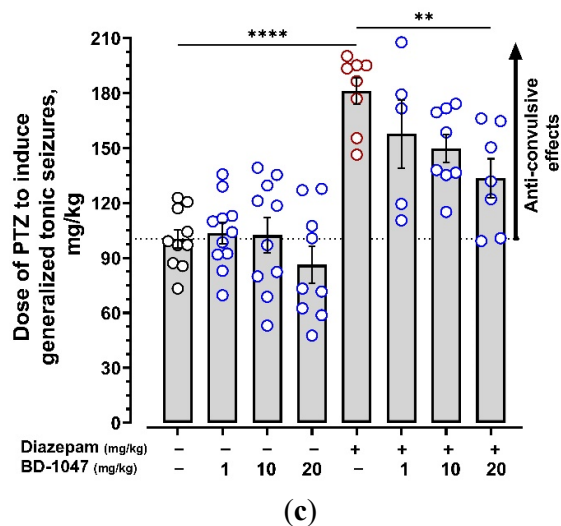

**Supplementary Figure S4.** The influence of Sigma1R antagonist BD-1047 on anticonvulsant activity of diazepam in the intravenous pentylenetetrazol infusion test on mice. (a) Clonic jerks; (b) Generalized clonic seizure; (c) Generalized tonic seizure. Data are presented as mean  $\pm$  S.E.M. Statistically significant differences according to the one-way ANOVA and the post hoc Dunnett multiple comparisons test: \*\*  $p < 0.01$ ; \*\*\*\*  $p < 0.0001$ .

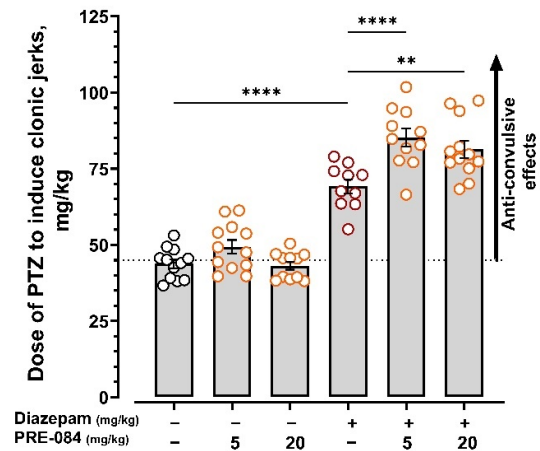

(a)

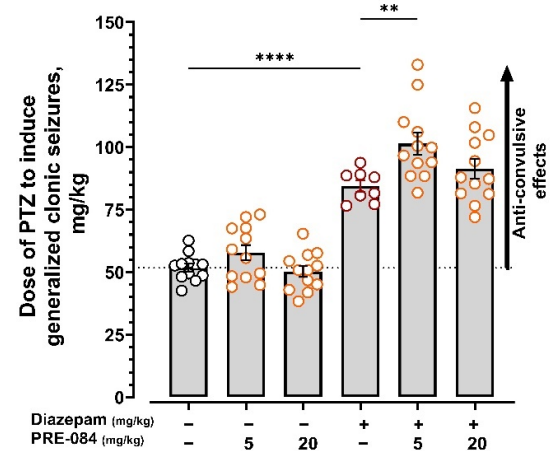

(b)

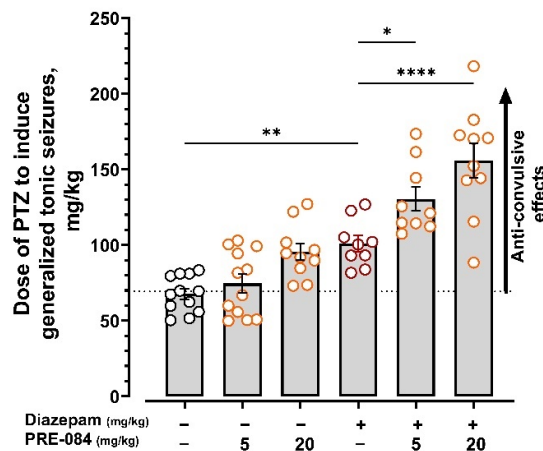

(c)

**Supplementary Figure S5.** The influence of Sigma1R agonist PRE-084 on anticonvulsant activity of diazepam in the intravenous pentylenetetrazol infusion test on mice. (a) Clonic jerks; (b) Generalized clonic seizure; (c) Generalized tonic seizure. Data are presented as mean  $\pm$  S.E.M. Statistically significant differences according to the one-way ANOVA and the post hoc Dunnett multiple comparisons test: \*  $p < 0,05$ ; \*\*  $p < 0,01$ ; \*\*\*\*  $p < 0,0001$ .

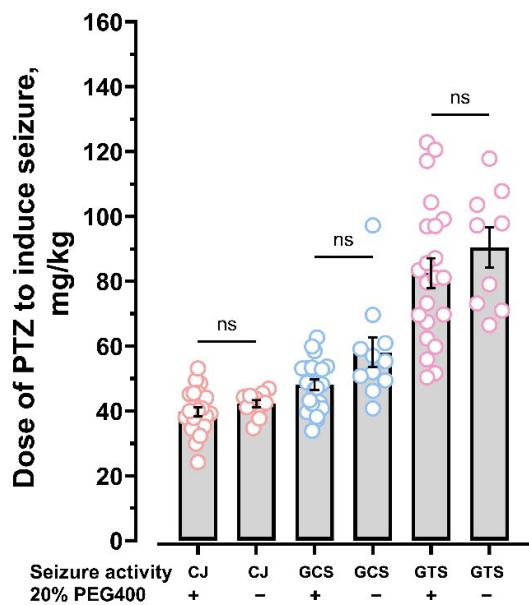

**Supplementary Figure S6.** The influence of 20% PEG 400 on convulsant activity of PTZ in the intravenous pentylenetetrazol infusion test on mice. CJ: clonic jerks, GCS: generalized clonic seizure, GTS: generalized tonic seizure. Data are presented as mean  $\pm$  S.E.M. Statistically significant differences according to the one-way ANOVA and the post hoc Dunnet multiple comparisons test: ns - not significant
